# Supplementary material for: Bioenergetics-based modeling of Plasmodium falciparum metabolism reveals its essential genes, nutritional requirements, and thermodynamic bottlenecks
Source: PLoS Comput Biol. 2017 Mar 23;13(3):e1005397. doi: 10.1371/journal.pcbi.1005397 (PMC5363809; doi:10.1371/journal.pcbi.1005397)
Supplement: S5 Table — 1Genes predicted as essential for iPfa growth with TFA and the MS data (2012, Vo Duy et al. [21]) in the alternative IMMs (10032 alternative IMMs, each composed of 23 substrates, see Table 2). 2Genes commonly essential in all alternative IMMs. 3If more than one reaction is associated with the gene, one enzyme name was chosen. (XLSX) [file pcbi.1005397.s006.xlsx]

## Sheet: Sheet1
Essential genes in iPfa1	Reactions associated to each gene	E.C.	Enzyme name3
PF3D7_09065002	R00551_c	3.5.3.1	L-Arginine amidinohydrolase
PF3D7_10331002	R00670_c, R00178_c	4.1.1.17, 4.1.1.50	L-ornithine carboxy-lyase (putrescine-forming)
PF3D7_14360002	R02740_c	5.3.1.9	alpha-D-Glucose 6-phosphate ketol-isomerase
PF3D7_05118002	R07324_c	5.5.1.4	1D-myo-inositol-3-phosphate lyase (isomerizing)
PF3D7_05122002	R00497_c	6.3.2.3	gamma-L-glutamyl-L-cysteine:glycine ligase (ADP-forming)
PF3D7_1116200.12	R07456_c	4.3.3.6
PF3D7_1116200.22	R07456_c	4.3.3.6
PF3D7_09189002	R00894_c	6.3.2.2	L-glutamate:L-cysteine gamma-ligase (ADP-forming)
PF3D7_06212002	R07456_c	4.3.3.6
PF3D7_0920800	R01130_c, R08240_c	1.1.1.205	IMP:NAD+ oxidoreductase
PF3D7_0610800	R01067_c, R01641_c, R06590_c, R01067_n, R01641_n, R06590_n	2.2.1.1	D-Fructose 6-phosphate:D-glyceraldehyde-3-phosphate glycolaldehyde transferase
PF3D7_0322300	R02251_r, R02251_c	2.3.1.20	acyl-CoA:1,2-diacyl-sn-glycerol O-acyltransferase
PF3D7_0513300	R08229_c, R01561_c, R01863_c, R01969_c, R02147_c, R02294_c, R02295_c, R02297_c, R02484_c, R02557_c, R02748_c, R08368_c, R10244_c	2.4.2.3, 2.4.2.1, 2.4.2.15, 2.4.2.4, 2.4.2.2	5-fluorouridine:phosphate alpha-D-ribosyltransferase
PF3D7_1012400	R00190_c, R01132_c, R01229_c, R02142_c, R08237_c, R08238_c, R08245_c	2.4.2.7, 2.4.2.8, 2.4.2.22	AMP, IMP:diphosphate phospho-D-ribosyltransferase
PF3D7_0922200	R00177_c, R04771_c	2.5.1.6	ATP:L-methionine S-adenosyltransferase
PF3D7_0915400	R00756_c, R00767_c, R00769_c, R00770_c, R01843_c, R03236_c, R03237_c, R03238_c, R03239_c	2.7.1.11, 2.7.1.56, 2.7.1.144	ATP:D-fructose-6-phosphate 1-phosphotransferase
PF3D7_0816100	R03269_c	4.1.1.36	N-[(R)-4-Phosphopantothenoyl]-L-cysteine carboxy-lyase
PF3D7_1444800	R01068_c, R01829_c, R02568_c	4.1.2.13	D-fructose-1,6-bisphosphate D-glyceraldehyde-3-phosphate-lyase (glycerone-phosphate-forming)
PF3D7_1219900	R01529_c	5.1.3.1	D-Ribulose-5-phosphate 3-epimerase
PF3D7_0514600	R01056_c	5.3.1.6	D-ribose-5-phosphate aldose-ketose-isomerase
PF3D7_1012600	R01230_c, R01231_c, R08244_c	6.3.5.2	Xanthosine-5-phosphate:ammonia ligase (AMP-forming)
PF3D7_1212500	R00851_r, R09380_r	2.3.1.15	acyl-ACP:sn-glycerol-3-phosphate 1-O-acyltransferase
PF3D7_0801800
PF3D7_1034400	R02164_UQH8_m	1.3.5.1, 1.3.5.4	Succinate:ubiquinone oxidoreductase
PF3D7_1212800	R02164_UQH8_m	1.3.5.1, 1.3.5.4	Succinate:ubiquinone oxidoreductase
PF3D7_1401800	R01021_c, R01021_r	2.7.1.32	ATP:choline phosphotransferase
PF3D7_0520900	R00192_c, R04936_c	3.3.1.1	S-Adenosyl-L-homocysteine hydrolase
PF3D7_1235600	R00945_c, R09099_c, R00945_a, R09099_a, R00945_m, R09099_m	2.1.2.1	5,10-Methylenetetrahydrofolate:glycine hydroxymethyltransferase
PF3D7_1324800	R00942_c, R02237_c	6.3.2.17, 6.3.2.12	Tetrahydrofolate:L-glutamate gamma-ligase (ADP-forming)
PF3D7_0810800	R03066_c, R03067_c, R03503_c	2.5.1.15, 2.7.6.3	2-amino-4-hydroxy-6-hydroxymethyl-7,8-dihydropteridine:4-aminobenzoate 2-amino-4-hydroxydihydropteridine-6-methenyltransferase
PF3D7_1224000	R00428_c, R04639_c, R05046_c, R05048_c	3.5.4.16	GTP 8,9-hydrolase, 2-Amino-4-hydroxy-6-(erythro-1,2,3-trihydroxypropyl) dihydropteridine triphosphate hydrolase
PF3D7_0922400	R01716_c	2.6.1.85	chorismate:L-glutamine aminotransferase
PF3D7_1458400	R05553_c	4.1.3.38	4-amino-4-deoxychorismate pyruvate-lyase
